# Supplementary material for: Co-developing the IPCC frequently asked questions as an effective science communication tool
Source: Springer Nature journal article supplement (doi:10.1007/s10584-021-03248-0), 2022-03-01
Supplement: MOESM1 [file 10584_2021_3248_MOESM1_ESM.pdf]

## Supplementary material to

### Co-Developing the IPCC frequently asked questions as an effective science communication tool

Sarah L. Connors<sup>1\*</sup>, Maike Nicolai<sup>2</sup>, Sophie Berger<sup>1</sup>, Rosalind Pidcock<sup>3</sup>, Melissa Walsh<sup>4</sup>, Nigel Hawtin<sup>5</sup>

<sup>1</sup> IPCC Working Group I Technical Support Unit, Université Paris Saclay, France

<sup>2</sup> Climate Service Center Germany (GERICS), Helmholtz-Zentrum Geesthacht (HZG), Germany

<sup>3</sup> Climate Outreach, Oxford, UK

<sup>4</sup> IPCC Secretariat, Geneva, Switzerland

<sup>5</sup> Information Design, London, UK

\*Corresponding author, email: sarah.connors@univeriste-paris-saclay.fr

## Audience survey on FAQs in the IPCC Special Report on Global Warming of 1.5°C

### Welcome

Hello survey participants,

The IPCC is preparing a Special Report on Global Warming of 1.5°C, due for release in October 2018.

Having been a popular resource in the Fifth Assessment Report, the IPCC will again be producing a set of Frequently Asked Questions (FAQs) as part of the Special Report. These offer short, plain language summaries of key issues raised by the report in a way that is clear, concise and accessible to non-specialists.

Given the broad audience of the Special Report on 1.5°C, we are keen to seek the perspectives of our stakeholders in the preparation of the FAQs. It would greatly help us if you could take 10 minutes to participate in this brief online survey.

Knowing how you have used FAQs in the past as well as your input on the choice of questions, design and format will help us ensure we meet the needs of our users as best as possible.

Deadline for submissions is midnight CET on Sunday 15 October.

Many thanks.

The IPCC WG1 Technical Support Unit

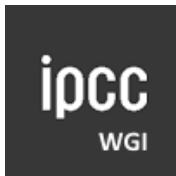

## Audience survey on FAQs in the IPCC Special Report on Global Warming of 1.5°C

### Your details

**Required questions are marked by an asterisk (\*).**

1. Name

\* 2. Your organisation

\* 3. Your role in the organisation

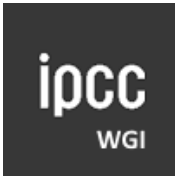

Audience survey on FAQs in the IPCC Special Report on Global Warming of 1.5°C

Previous IPCC FAQs

4. Have you used IPCC FAQs in the past?

- Yes, often
- Occasionally
- No

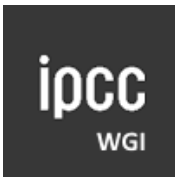

Audience survey on FAQs in the IPCC Special Report on Global Warming of 1.5°C

Answered yes / occasionally

5. How did you / your organisation use the IPCC FAQs? Please specify

Use 1:

Use 2:

Use 3:

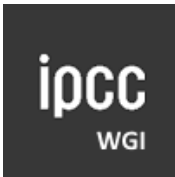

Audience survey on FAQs in the IPCC Special Report on Global Warming of 1.5°C

Answered no

6. What was the reason for not using the IPCC FAQs?

- Didn't know they exist
- Too technical
- Too simple
- Not useful subjects

Other (please specify)



Audience survey on FAQs in the IPCC Special Report on Global Warming of 1.5°C

Other uses of FAQs

7. How do you see the FAQs being valuable for other specific users / audiences?

Use 1:

Use 2:

Use 3:



## Audience survey on FAQs in the IPCC Special Report on Global Warming of 1.5°C

### Suggested FAQ topics

8. Suggest topics you'd like to see covered in the Special Report on 1.5°C FAQs.

Topic 1:

Topic 2:

Topic 3:

Topic 4:

Topic 5:

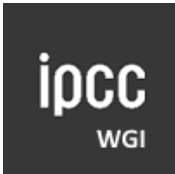

## Audience survey on FAQs in the IPCC Special Report on Global Warming of 1.5°C

### Example FAQs

9. How useful would you / your organisation find the following FAQs?

very useful      quite useful      not useful at all      Don't know

**Why are we talking about 1.5°C?**

Any comments

**What did the Paris Agreement say about 1.5°C?**

very useful    quite useful    not useful at all    Don't know

Any comments

**What do we stand to gain by limiting global warming to 1.5°C?**

          

Any comments

**Hasn't the world warmed by more than 1.5°C in the past?**

          

Any comments

**How close are we to 1.5°C already?**

          

Any comments

**Are we on track to keep global warming below 1.5°C?**

          

Any comments

**Is limiting global warming to 1.5°C feasible?**

          

Any comments

**What needs to happen to greenhouse gas emissions to keep warming below 1.5°C?**

          

Any comments

**What policies do we need to keep global warming below 1.5°C?**

          

Any comments

**How much will it cost to keep global warming below 1.5°C?**

          

Any comments

**Can countries get richer and keep warming below 1.5°C at the same time?**

          

Any comments

very useful    quite useful    not useful at all    Don't know

**What happens if we overshoot 1.5°C?**

          

Any comments

**What is the difference between 1.5°C and 2°C of global warming?**

          

Any comments

**If warming stays below 1.5°C, will we avoid tipping points?**

          

Any comments

**Will limiting warming to 1.5°C save Arctic sea ice and coral reefs?**

          

Any comments

**Why does it matter if we delay action to cut emissions?**

          

Any comments

**Do I have to stop flying and eating meat to keep warming below 1.5°C?**

          

Any comments

**How will limiting warming to 1.5°C affect my quality of life?**

          

Any comments

**Can we limit warming to 1.5°C and still feed a growing population?**

          

Any comments

**How could keeping warming below 1.5°C help ease other world problems?**

          

Any comments

**What would a 1.5°C warming limit mean for extreme weather?**

very useful    quite useful    not useful at all    Don't know

Any comments

**What are negative emissions and can they help limit warming to 1.5°C?**

          

Any comments

**What is Solar Radiation Management?**

          

Any comments

**Can we adapt to 1.5°C of global warming?**

          

Any comments

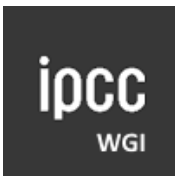

## Audience survey on FAQs in the IPCC Special Report on Global Warming of 1.5°C

### FAQ formats

10. Which of the following FAQ formats would be most useful to you / your organisation?

- Printed booklet
- Online version
- Text only
- Interactive graphics
- Videos
- Infographics
- Scientific figures

Other (please specify)



Audience survey on FAQs in the IPCC Special Report on Global Warming of 1.5°C

FAQ length

11. How long do you think each FAQ should be?

- Half page (text only)
- Half page (including figure)
- One page (text only)
- One page (including figure)
- Two pages (text only)
- Two pages (including figure)
- Other (please specify)



Audience survey on FAQs in the IPCC Special Report on Global Warming of 1.5°C

Additional details

12. Nationality

13. Country of residence



14. Gender

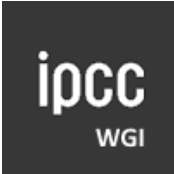

Audience survey on FAQs in the IPCC Special Report on Global Warming of 1.5°C

Any other comments

15. Any other comments, suggestions, or feedback?
